# Supplementary material for: Tunable upconversion in ZnAl2−xGaxO4:Er,Yb phosphors by modulating the Al/Ga ratio and application in optical thermometry
Source: Royal Society of Chemistry journal article supplement (doi:10.1039/d3nj03690a), 2023-01-01
Supplement: d3nj03690a1.pdf [file d3nj03690a1.pdf]

## Tunable Upconversion in $\text{ZnAl}_{2-x}\text{Ga}_x\text{O}_4$ : Er,Yb Phosphors by Modulating Al/Ga Ratio and Application in Optical Thermometry

Reshmi Thekke Parayil<sup>1,2</sup>, Santosh K. Gupta,<sup>1,2\*</sup> Madan Murari Upadhyay,<sup>3</sup> Kathi Sudarshan,<sup>1,2</sup>, Manoj Mohapatra,<sup>1,2</sup>

<sup>1</sup>Homi Bhabha National Institute, Anushaktinagar, Mumbai – 400094, India

<sup>2</sup>Radiochemistry Division, Bhabha Atomic Research Centre, Trombay, Mumbai-400085, India

<sup>3</sup>Optical Materials & Bio-imaging Research Laboratory, Department of Physics, Indian Institute of Technology (Indian School of Mines), Dhanbad 826004, India

To whom correspondence should be addressed. Electronic mail: \*santoshg@barc.gov.in/  
santufrnd@gmail.com

**Table S1: Color coordinate values of  $\text{ZnAl}_{2-x}\text{Ga}_x\text{O}_4$ -Er, Yb (x=0, 0.25, 0.5, 1, 1.5, 1.75, 2)**

| Sample name                                                | x       | y       |
|------------------------------------------------------------|---------|---------|
| 1) $\text{ZnAl}_2\text{O}_4$ -Er, Yb                       | 0.56608 | 0.41800 |
| 2) $\text{ZnGa}_{0.25}\text{Al}_{1.75}\text{O}_4$ - Er, Yb | 0.51637 | 0.45332 |
| 3) $\text{ZnGa}_{0.5}\text{Al}_{1.5}\text{O}_4$ - Er, Yb   | 0.48119 | 0.47773 |
| 4) $\text{ZnGa}_1\text{Al}_1\text{O}_4$ - Er, Yb           | 0.46067 | 0.52073 |
| 5) $\text{ZnGa}_{1.5}\text{Al}_{0.5}\text{O}_4$ - Er, Yb   | 0.40959 | 0.57249 |
| 6) $\text{ZnGa}_{1.75}\text{Al}_{0.25}\text{O}_4$ - Er, Yb | 0.42636 | 0.55911 |
| 7) $\text{ZnGa}_2\text{O}_4$ - Er, Yb                      | 0.40509 | 0.57957 |

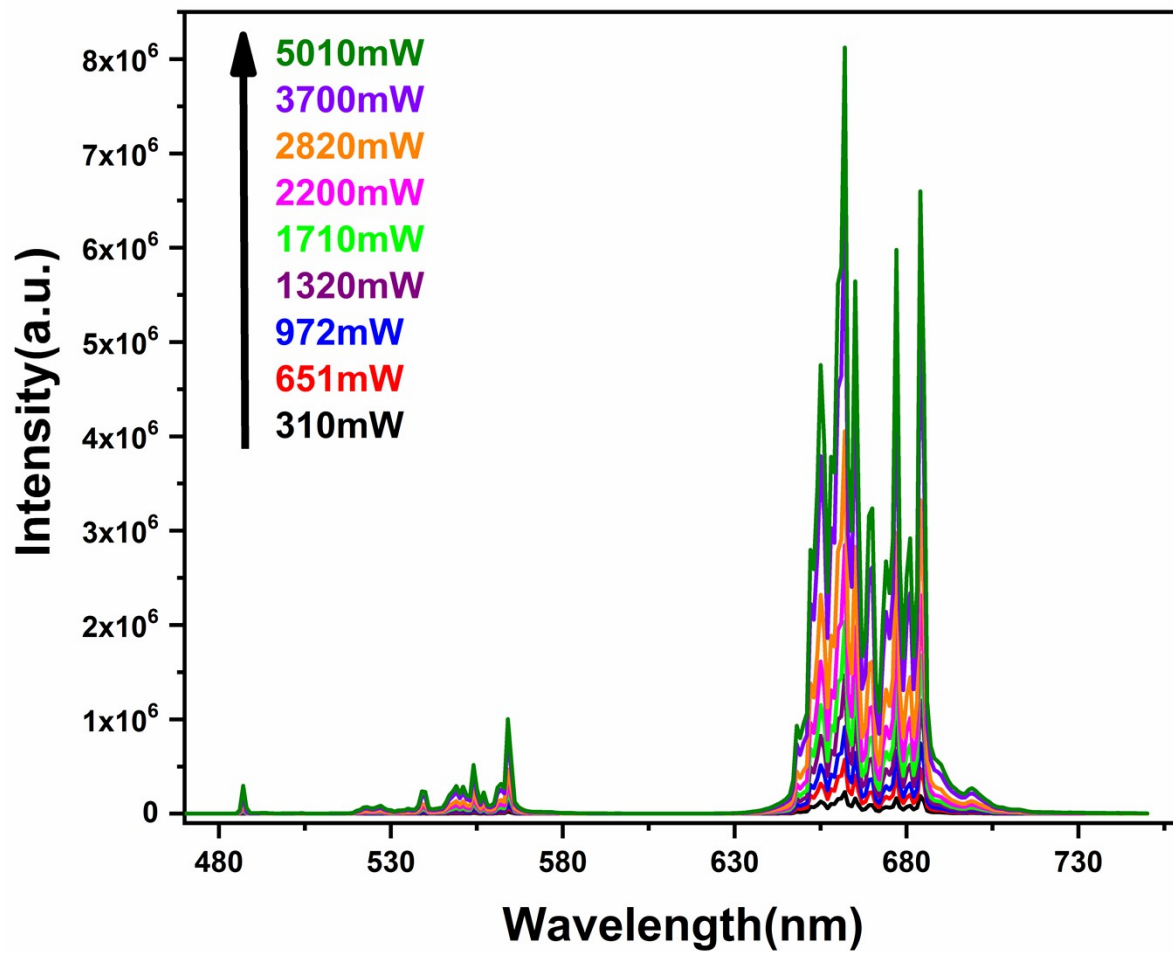

Figure S1: UC Emission spectra with various pump power of ZnAl<sub>2</sub>O<sub>4</sub>: Er,Yb

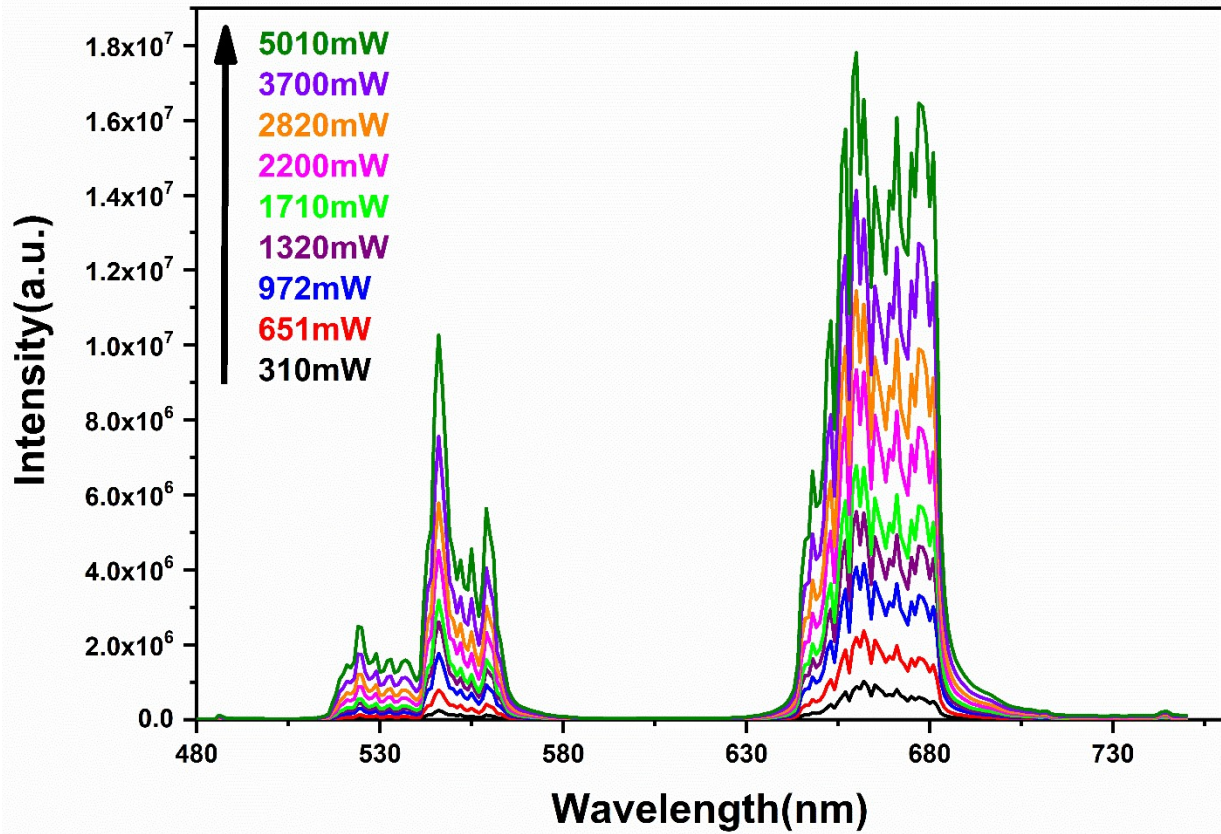

Figure S2: UC Emission spectra with various pump power of ZnGa<sub>2</sub>O<sub>4</sub>: Er, Yb

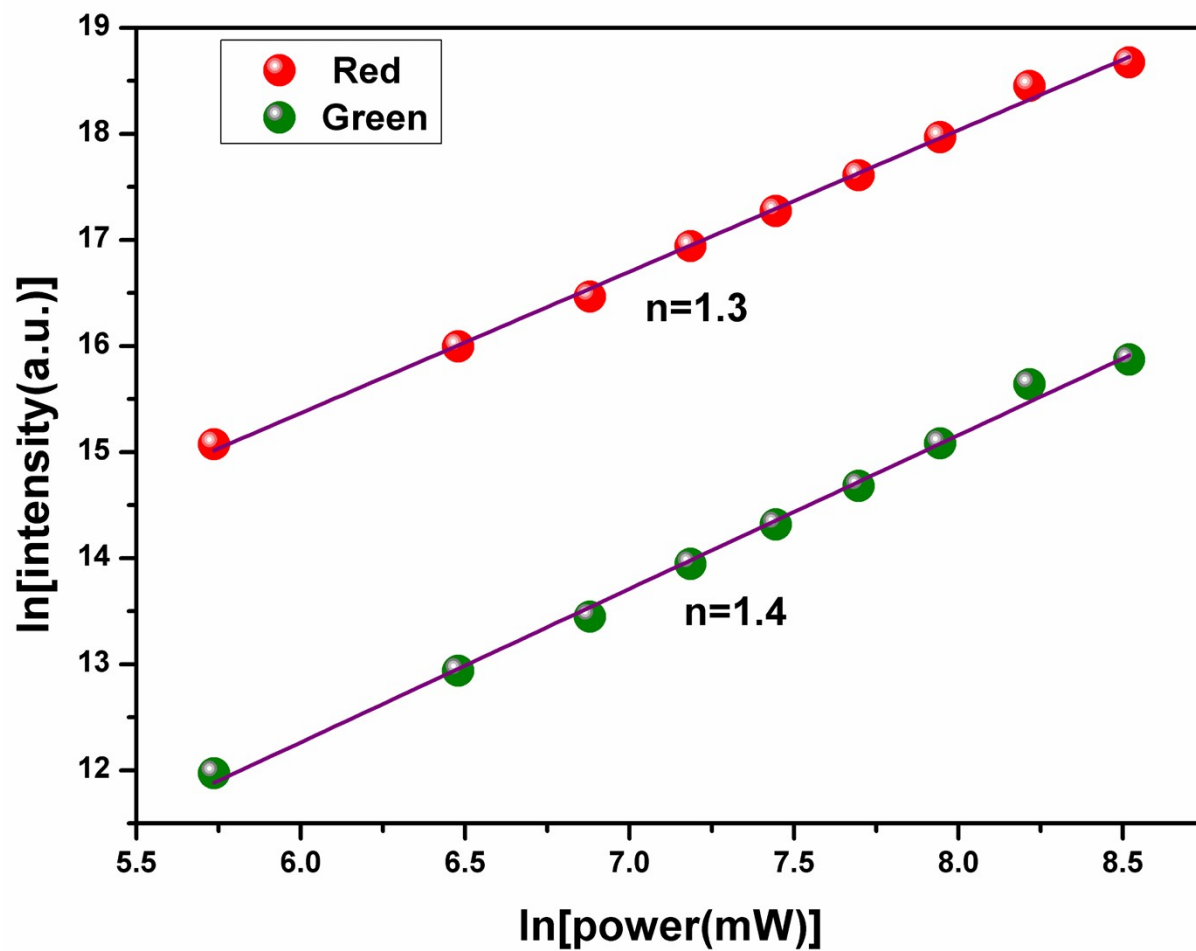

Figure S3: Dependence of pump power on green and red emission of  $\text{ZnAl}_2\text{O}_4:\text{Er,Yb}$

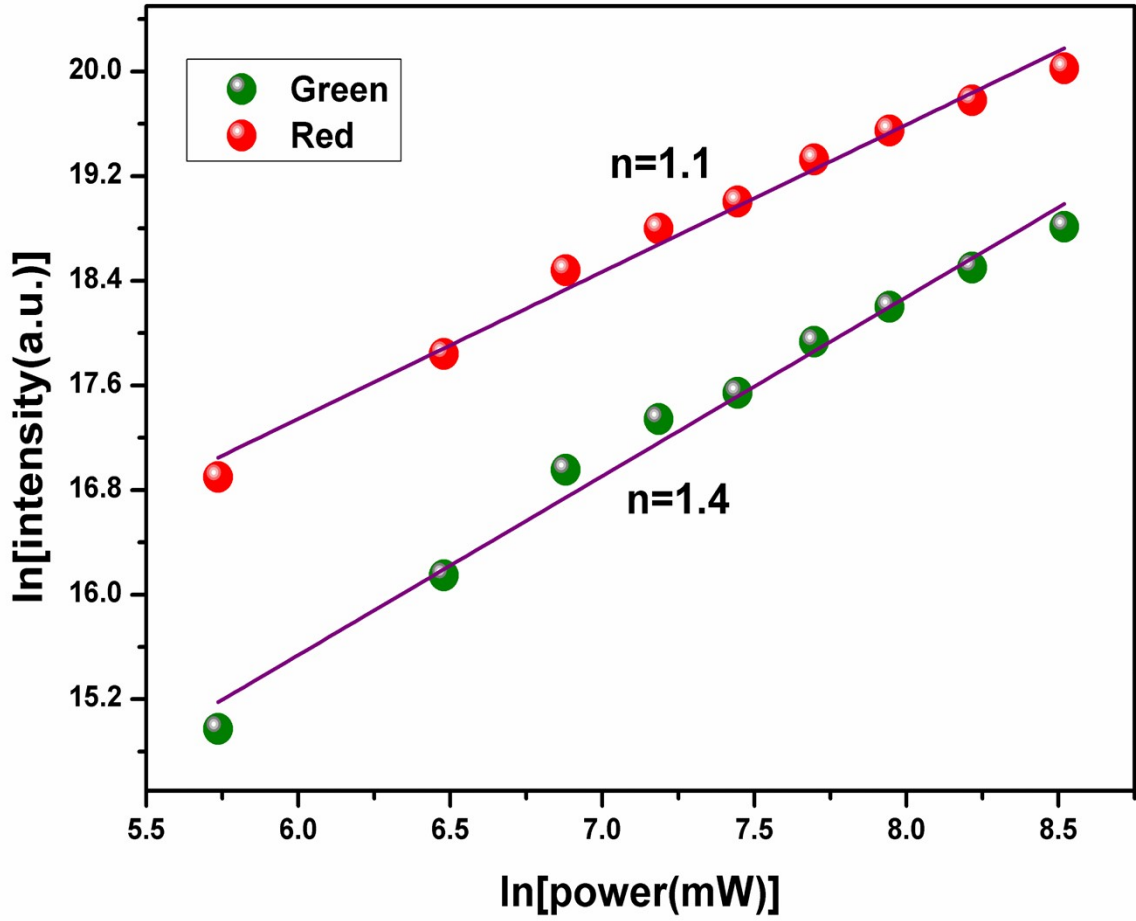

Figure S4: Dependence of pump power on green and red emission of  $\text{ZnGa}_2\text{O}_4: \text{Er, Yb}$

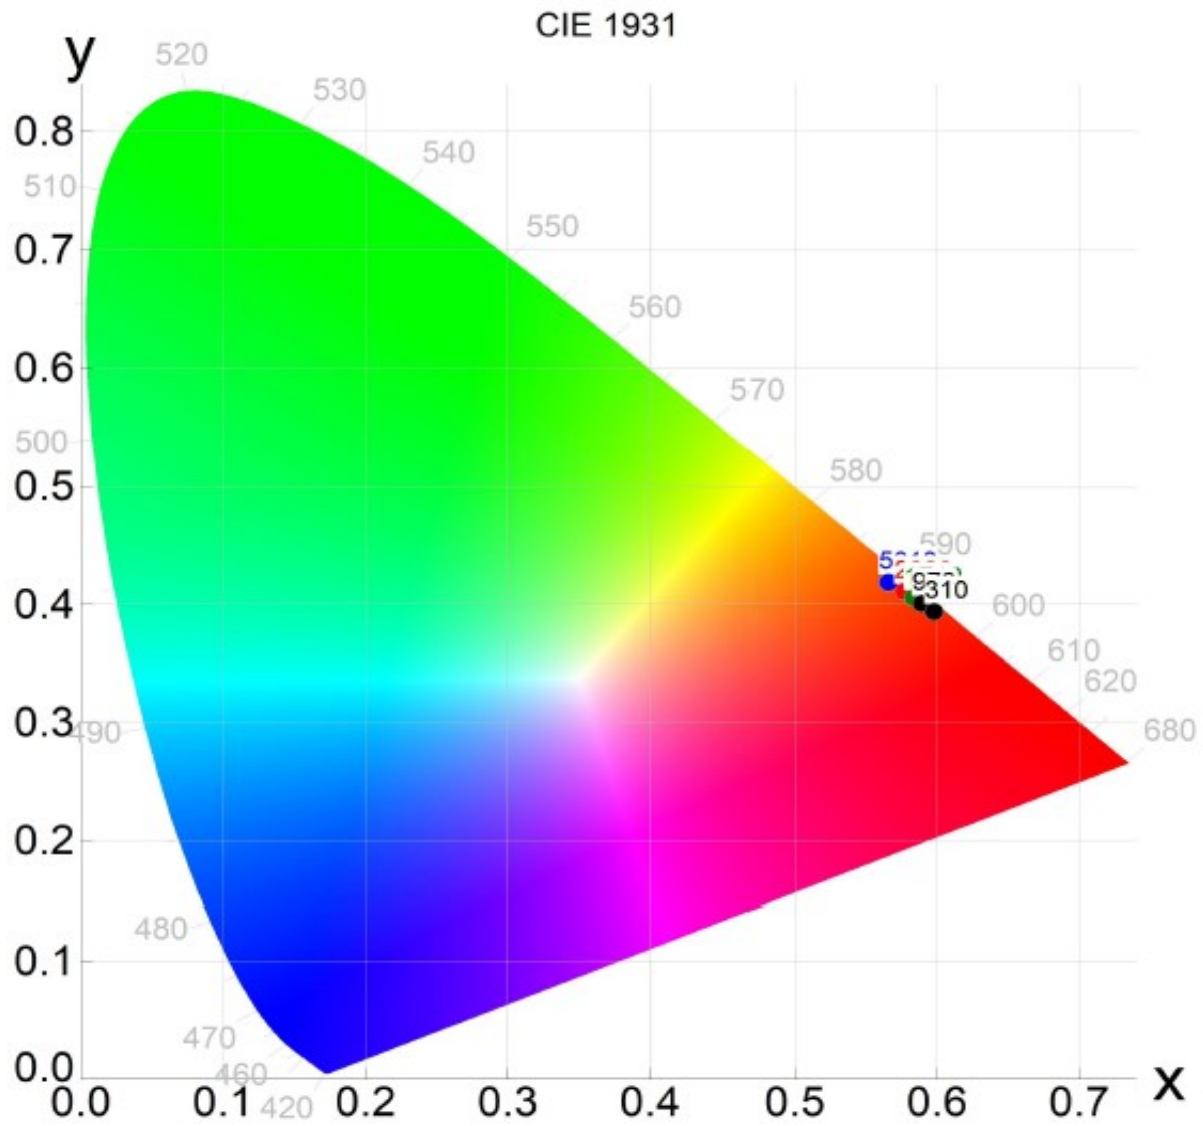

**Figure S5: CIE Chromaticity diagram of  $\text{ZnAl}_2\text{O}_4: \text{Er, Yb}$  with different laser power of 310,972,1710,2820 and 5010mW**

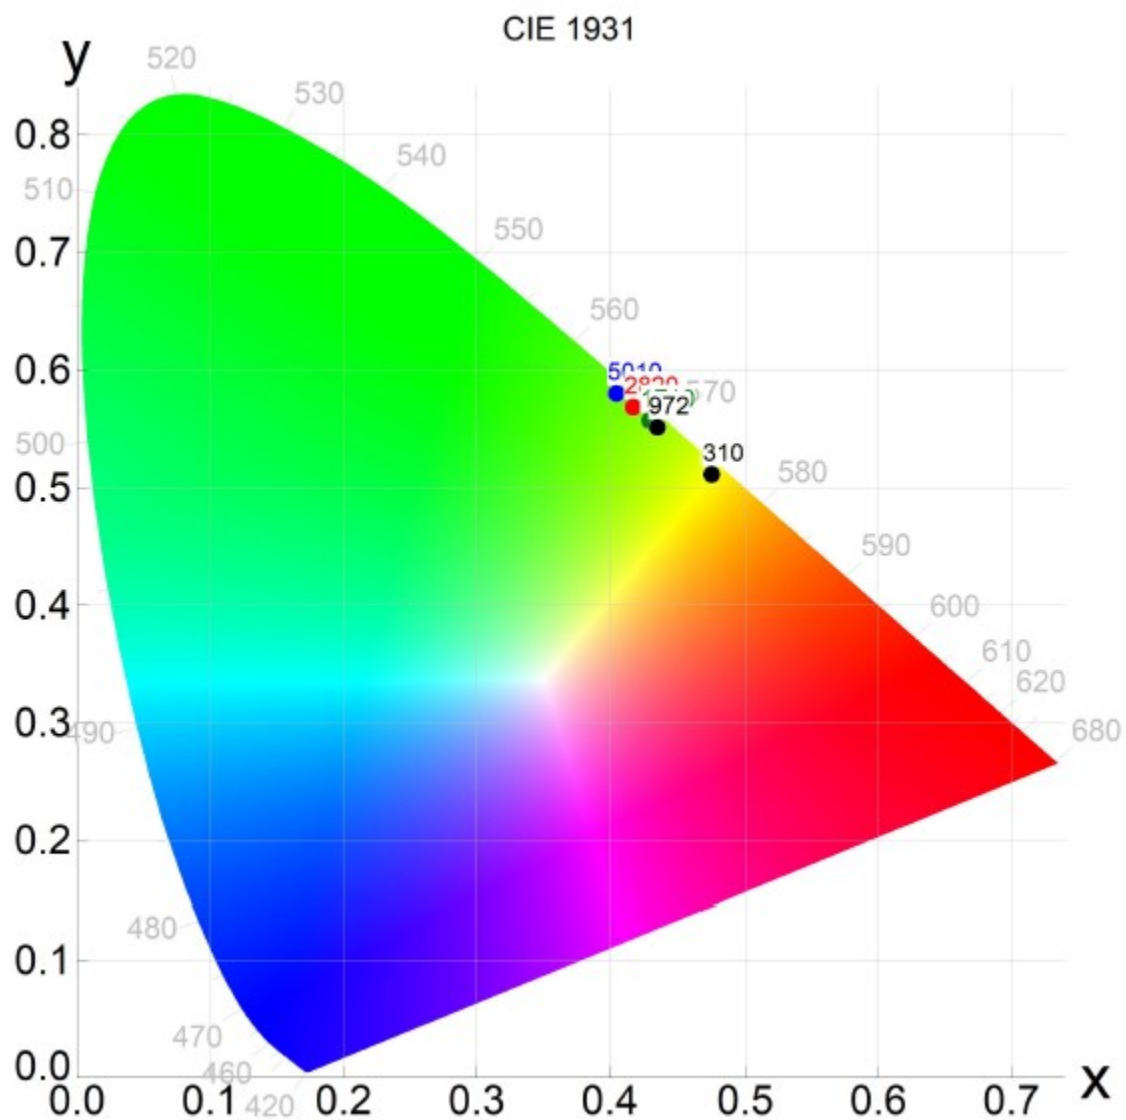

**Figur**

**e S6: CIE Chromaticity diagram of  $\text{ZnGa}_2\text{O}_4: \text{Er, Yb}$ . with different laser power of 310,972,1710,2820 and 5010mW**

**Table S2. Average life time values of ZnAl<sub>1</sub>Ga<sub>1</sub>O<sub>4</sub>: Er,Yb**

| <b>Laser power (mW)</b> | <b><math>\tau_{av}(\mu\text{s})</math><br/><math>\lambda_{ex}=980\text{nm},</math><br/><math>\lambda_{em}=530 \text{ nm}</math></b> | <b><math>\tau_{av}(\mu\text{s})</math><br/><math>\lambda_{ex}=980\text{nm},</math><br/><math>\lambda_{em}=665 \text{ nm}</math></b> |
|-------------------------|-------------------------------------------------------------------------------------------------------------------------------------|-------------------------------------------------------------------------------------------------------------------------------------|
| 310                     | 33.6                                                                                                                                | 46.5                                                                                                                                |
| 651                     | 66.14                                                                                                                               | 54.3                                                                                                                                |
| 972                     | 100.58                                                                                                                              | 53.06                                                                                                                               |
| 1320                    | 123.5                                                                                                                               | 60.12                                                                                                                               |
| 1710                    | 132.5                                                                                                                               | 66.3                                                                                                                                |
| 2200                    | 137.7                                                                                                                               | 68.1                                                                                                                                |
| 2820                    | 144.32                                                                                                                              | 74.9                                                                                                                                |
| 3700                    | 150.5                                                                                                                               | 80.7                                                                                                                                |
| 5010                    | 156.4                                                                                                                               | 84.5                                                                                                                                |



**Table S3: Color coordinate values of ZnAl<sub>1</sub>Ga<sub>1</sub>O<sub>4</sub>-Er,Yb**

| <b>Laser power (mW)</b> | <b>x</b> | <b>y</b> |
|-------------------------|----------|----------|
| 310                     | 0.51290  | 0.47289  |
| 972                     | 0.49004  | 0.49644  |
| 1710                    | 0.47926  | 0.50541  |
| 2820                    | 0.46849  | 0.51444  |
| 5010                    | 0.46067  | 0.52073  |
